# Supplementary material
Source: Springer Nature journal article supplement (https://www.springermedizin.de/resource/supplementary/12879_2013_2443_MOESM2_ESM.pdf/9444590)
Supplement: MOESM2 [file 9444590]

Table 2: The trend of clinical & nutritional status among study participants comparing adherent & non-adherent subjects using mean at each visit in Tigray regional state, northern Ethiopia, 2012

| Characteristics of study participants        | Status of adherence to ART | At initiation of ART | 1st visit of last three visits | 2nd visit of last three visits | 3rd visit of last three visits | Current visit |
|----------------------------------------------|----------------------------|----------------------|--------------------------------|--------------------------------|--------------------------------|---------------|
| BMI (Kg/m <sup>2</sup> )                     | Adherent                   | 18.5                 | 20.2                           | 20.7                           | 21.0                           | 21.5          |
|                                              | Non-adherent               | 17.9                 | 19.1                           | 19.3                           | 19.1                           | 19.1          |
| Weight (Kg)                                  | Adherent                   | 50.8                 | 55.5                           | 56.8                           | 57.5                           | 59.1          |
|                                              | Non-adherent               | 48.1                 | 51.5                           | 51.8                           | 51.4                           | 51.3          |
| Observed HGB (mg/dl)                         | Adherent                   | 12.2                 | 13.8                           | 14.2                           | 14.5                           | 14.5          |
|                                              | Non-adherent               | 12.3                 | 13.3                           | 13.6                           | 13.8                           | 13.8          |
| Adjusted HGB by altitude (mg/dl)             | Adherent                   | 11.4                 | 13.0                           | 13.4                           | 13.7                           | 13.7          |
|                                              | Non-adherent               | 11.5                 | 12.5                           | 12.8                           | 13.0                           | 13.0          |
| TLC (10 <sup>6</sup> cells/mm <sup>3</sup> ) | Adherent                   | 5.5                  | 5.6                            | 5.6                            | 5.7                            | 5.6           |
|                                              | Non-adherent               | 5.3                  | 5.4                            | 5.6                            | 5.6                            | 5.7           |
| CD4 (cells/mm <sup>3</sup> )                 | Adherent                   | 155                  | 408                            | 460                            | 495                            | 522           |
|                                              | Non-adherent               | 140                  | 282                            | 302                            | 324                            | 304           |

N.B:- BMI=Body Mass Index, HGB=Hemoglobin, TLC=Total Leukocyte Count, CD<sub>4</sub>=Cluster of Differentiation 4
